# Supplementary material for: Annexins A2 and A5 are potential early biomarkers of hepatocarcinogenesis
Source: PubMed Central journal article supplement (PMC10147597; doi:10.1038/s41598-023-34117-8), 2023-04-28

## Supplementary Information

### **Annexins A2 and A5 are potential early biomarkers of hepatocarcinogenesis**

Ema Elvira Herrera-López, Dafne Guerrero-Escalera, Isaac Aguirre-Maldonado, Arely López-Hernández, Hilda Montero, María Angélica Gutiérrez-Nava, Luis del Pozo-Yauner, Jaime Arellanes-Robledo, Javier Camacho, Julio Isael Pérez-Carreón\*

\* Corresponding author: Julio Isael Pérez-Carreón. Instituto Nacional de Medicina Genómica. Periférico Sur No. 4809, Col. Arenal Tepepan, Alcaldía Tlalpan. México, D.F. C.P. 14610. Tel. +52 (55) 5350-1900 ext. 1170, Fax 5350-1999. E-mail: [jjperez@inmegen.gob.mx](mailto:jjperez@inmegen.gob.mx)

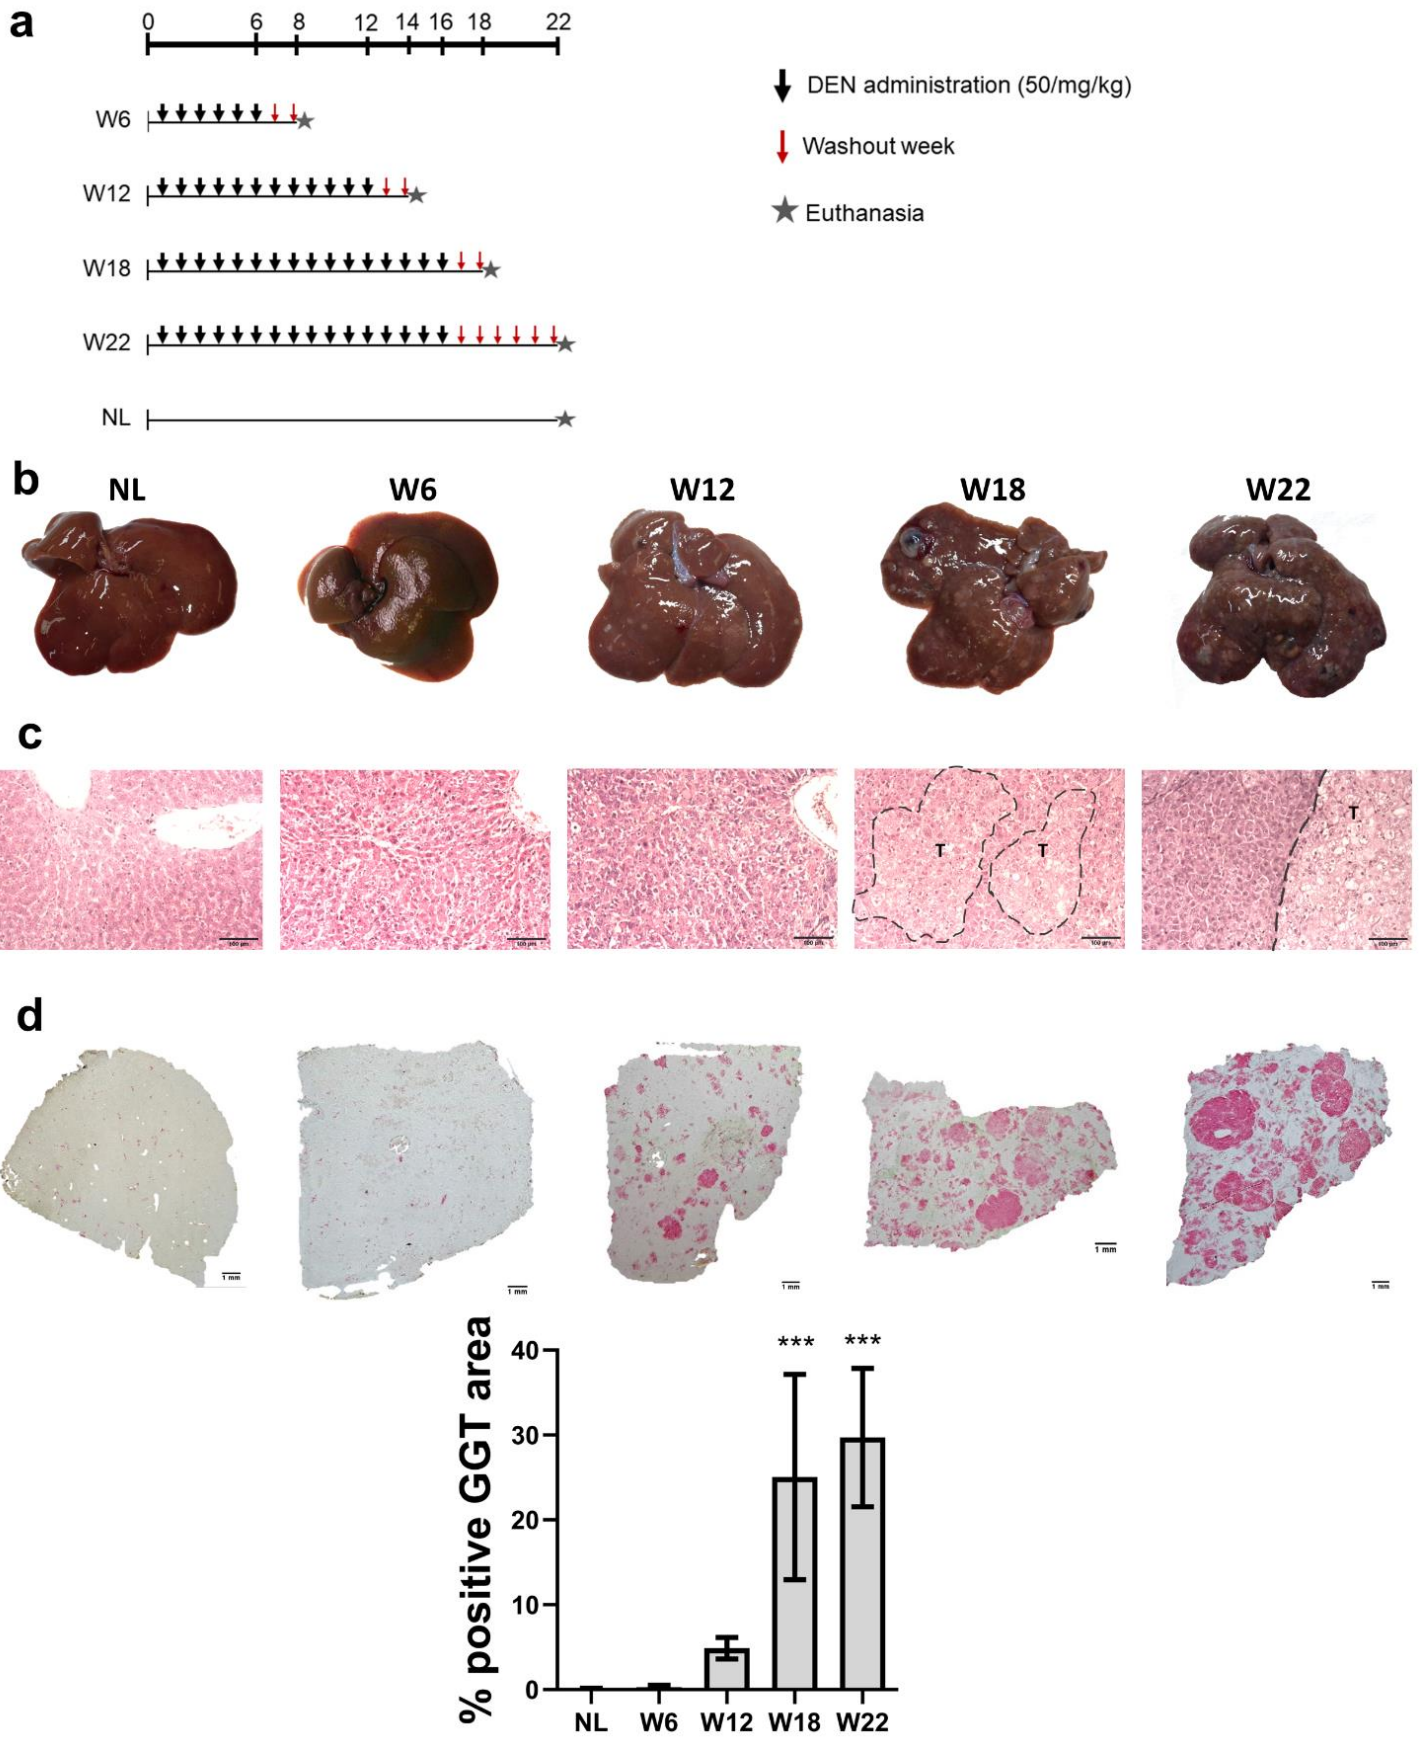

**Figure S1. Experimental design and sequential HCC progression in the rat model.** (a) The hepatocarcinogenesis protocol shows that DEN (50 mg/kg) was intraperitoneally administered once a week until 16 weeks, as indicated by arrows. Rats were subjected to euthanasia after two weeks of the last DEN administration, i.e., at 8, 14, and 18, respectively, except for 22 weeks group, which was euthanized six weeks after the last DEN dose. NL group was subjected to 16 injections of the vehicle (0.9% saline) and was euthanized six weeks after the last injection. (b) Representative images of livers. (c) H&E- stained sections. Magnification: 200X. Scale bar = 100  $\mu$ m. (d) Histological sections show GGT-positive nodules and tumors, Scale bar = 1 mm. DEN, diethylnitrosamine; NL, normal liver; W, week; T, tumor.

**Supplementary Table 1. TaqMan Gene Expression Assay Information**

| Gene Name         | Gene Symbol:  | Assay ID      | 5' reporter dye | 3' nonfluorescent quencher | RefSeq         | Exon Boundary | Assay Location | Amplicon Length |
|-------------------|---------------|---------------|-----------------|----------------------------|----------------|---------------|----------------|-----------------|
| annexin A1        | <i>Anxa1</i>  | Rn00563742_m1 | FAM             | MGB                        | NM_012904.2    | 8 - 9         | 669            | 81              |
| annexin A2        | <i>Anxa2</i>  | Rn00571516_m1 | FAM             | MGB                        | NM_019905.1    | 7 - 8         | 571            | 78              |
| annexin A5        | <i>Anxa5</i>  | Rn00565571_m1 | FAM             | MGB                        | NM_013132.1    | 4 - 5         | 252            | 115             |
| annexin A8        | <i>Anxa8</i>  | Rn01756160_m1 | FAM             | MGB                        | NM_001031654.1 | 3 - 4         | 228            | 66              |
| annexin A10       | <i>Anxa10</i> | Rn01402905_m1 | FAM             | MGB                        | NM_001109110.1 |               | 647            | 67              |
| 18S ribosomal RNA | <i>Rn18s</i>  | Rn03928990_g1 | FAM             | MGB                        | NR_046237.1    | 1             | 152            | 61              |

## Original blots of Figure 2

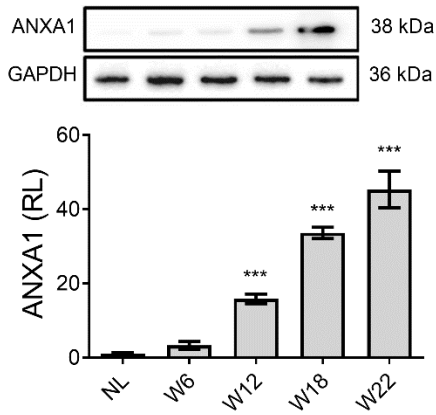

**General information**

**Annexin A1.** ANXA1 [1:300] NBP1-90162; RRID: AB\_11018791  
 1-second exposure time  
 Theoretical MW: 38 KDa  
 Supplier-reported MW: 35-55 KDa  
 Estimation MW: 36.8 KDa

**GAPDH.** [1:10000]; ab181602; RRID: AB\_2630358  
 2-second exposure time  
 Theoretical MW: 36 KDa  
 Supplier-reported MW: 25-37 KDa  
 Estimation MW: 36.9 KDa

Original images captured with the Uvitec MINI HD6 photo documentation system.

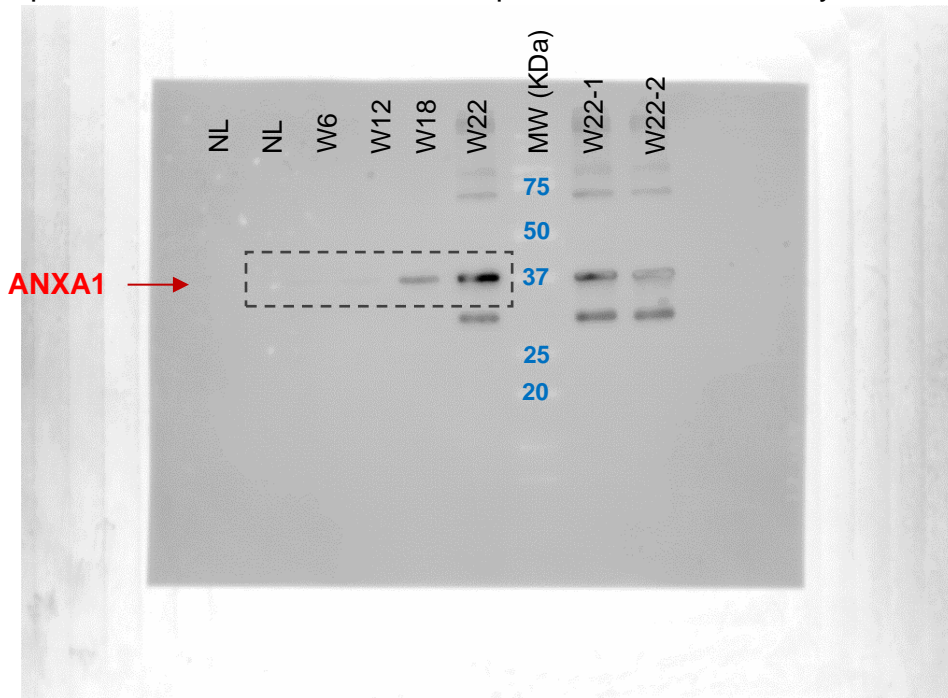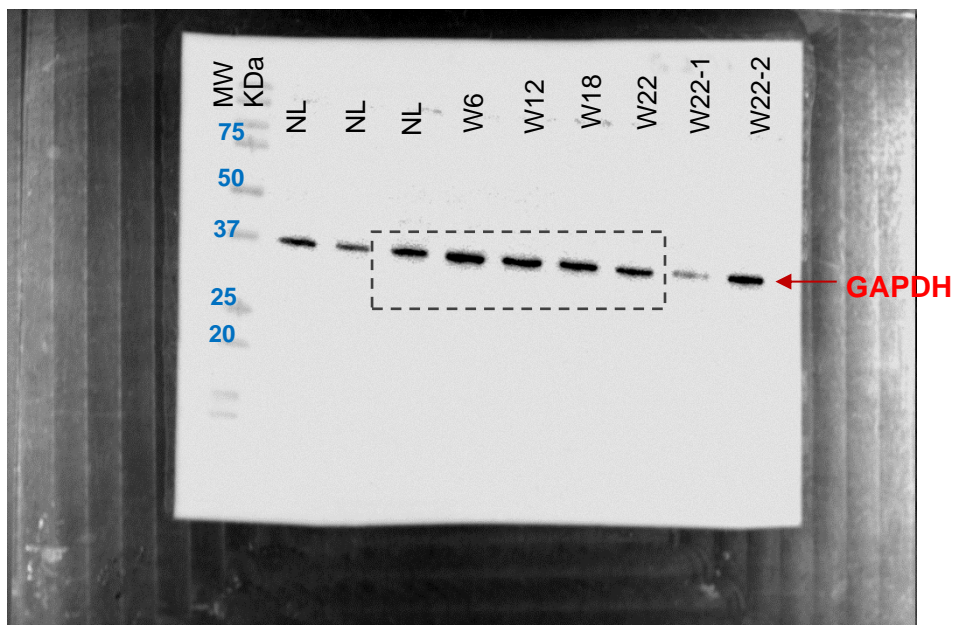

## Original blots of Figure 2

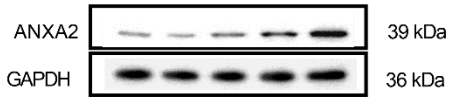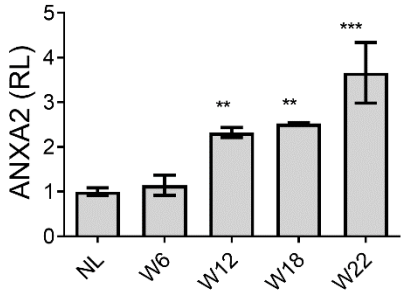

### General information

**Annexin A2.** ANXA2 [1:500] NBP1-31310; RRID: AB\_2242775

1-second exposure time

Theoretical molecular weight (MW): 39 KDa

Supplier-reported MW: 34-43 KDa

Estimation MW: 40.9 KDa

**GAPDH,** [1:10000]; ab181602; RRID: AB\_2630358

5-second exposure time

Theoretical MW: 36 KDa

Supplier-reported MW: 25-37 KDa

Estimation MW: 36.9 KDa

Original images captured with the Uvitec MINI HD6 photo documentation system.

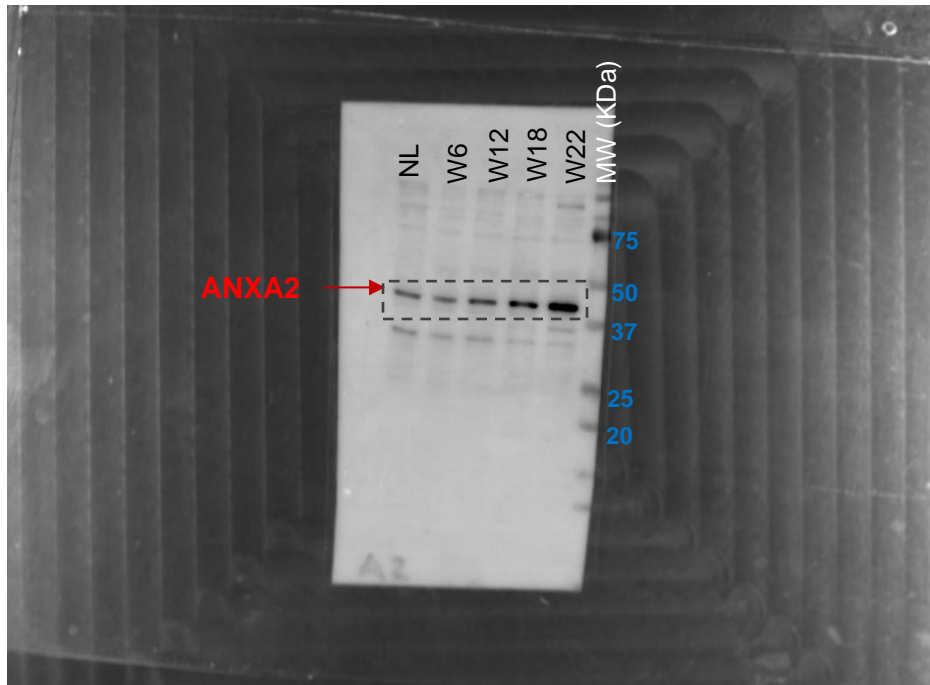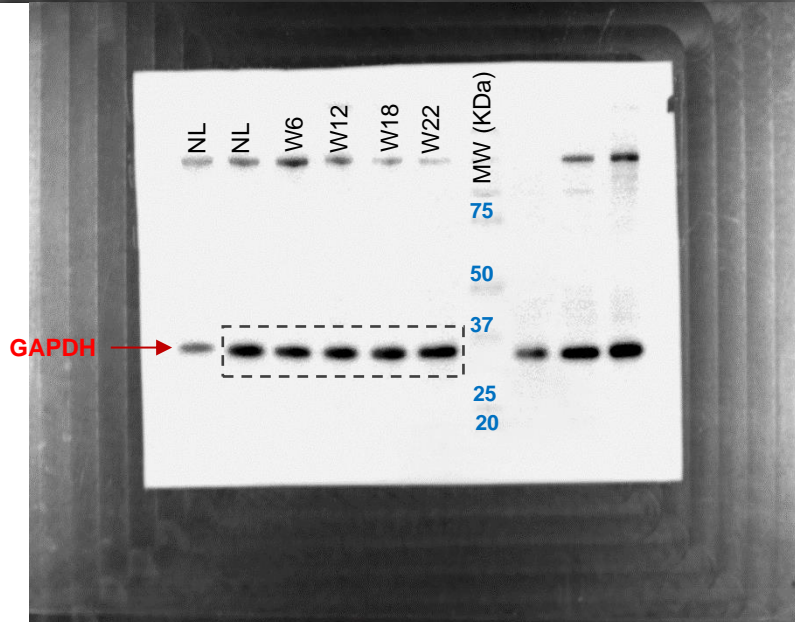



## Original blots of Figure 2

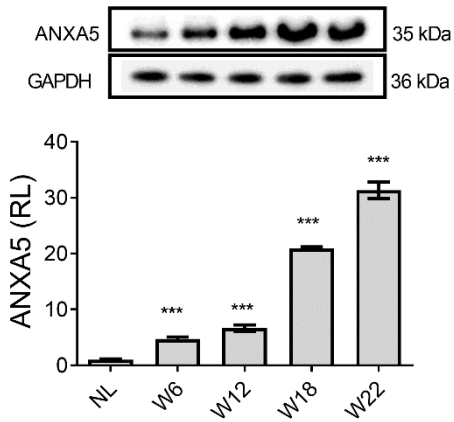

**General information**  
**Annexin A5.** ANXA5 [1:500] NBP2-38248  
6-second exposure time  
Theoretical MW: 35 KDa  
Supplier-reported MW: 28-36 KDa  
Estimation MW: 33.3 KDa

**GAPDH,** [1:10000]; ab181602; RRID: AB\_2630358  
5-second exposure time  
Theoretical MW: 36 KDa  
Supplier-reported MW: 25-37 KDa  
Estimation MW: 36.9 KDa

Original images captured with the Uvitec MINI HD6 photo documentation system.

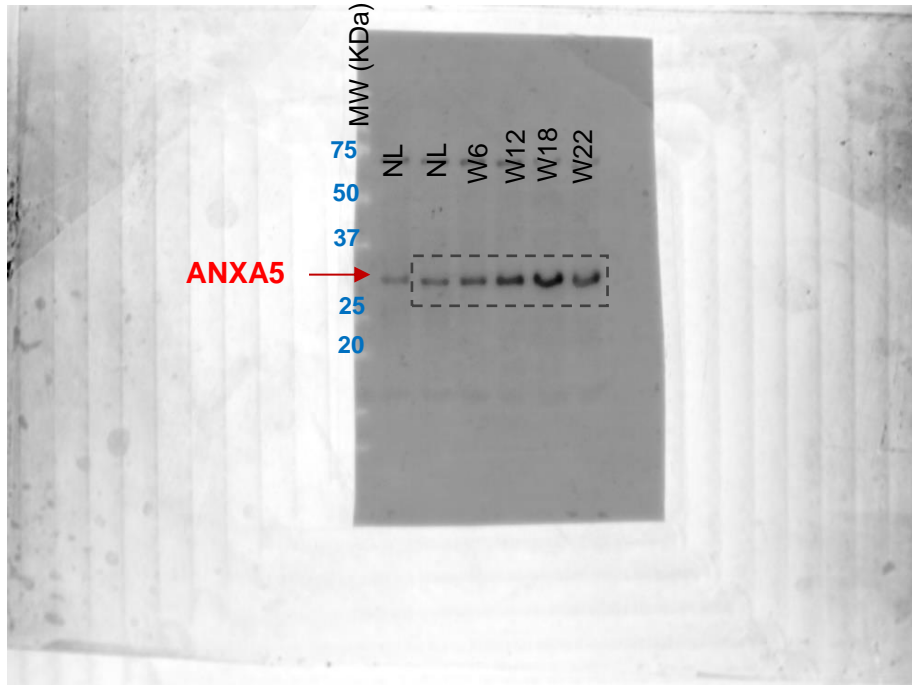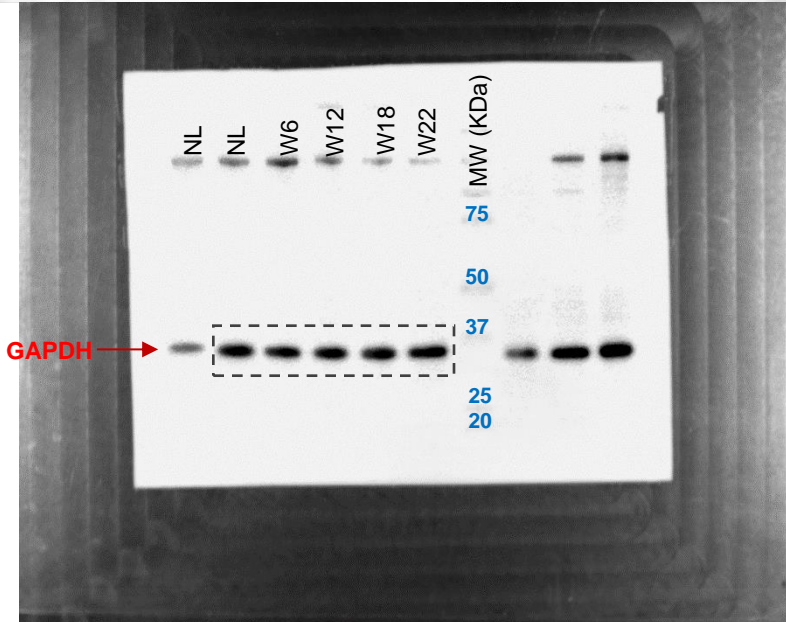

## Original blots of Figure 2

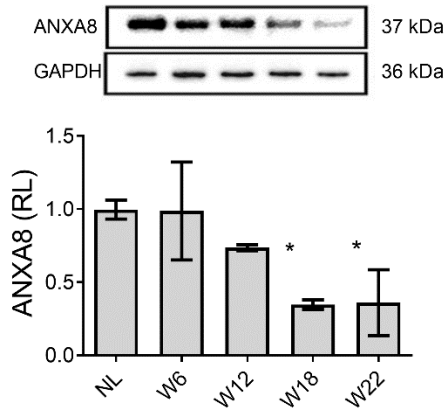

### General information

**Annexin A8.** ANXA8 [1:500]; ab111693; RRID: AB\_10858116  
9-second exposure time  
Theoretical MW: 37 KDa  
Supplier-reported MW: 34-43 KDa  
Estimation MW: 42.3 KDa

**GAPDH,** [1:10000]; ab181602; RRID: AB\_2630358  
9-second exposure time  
Theoretical MW: 36 KDa  
Supplier-reported MW: 25-37 KDa  
Estimation MW: 36.9 KDa

Original images captured with the Uvitec MINI HD6 photo documentation system.

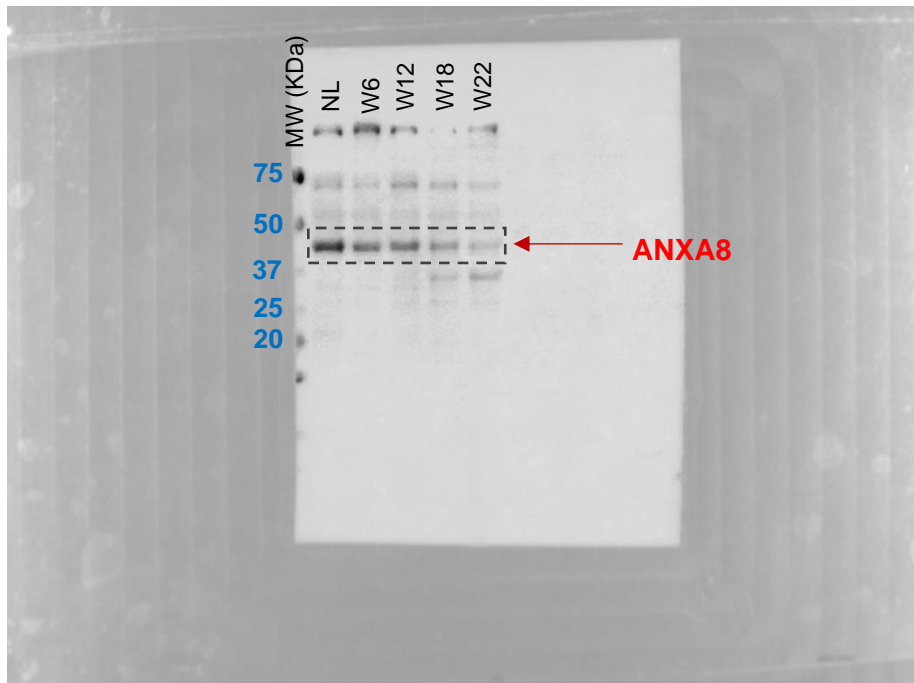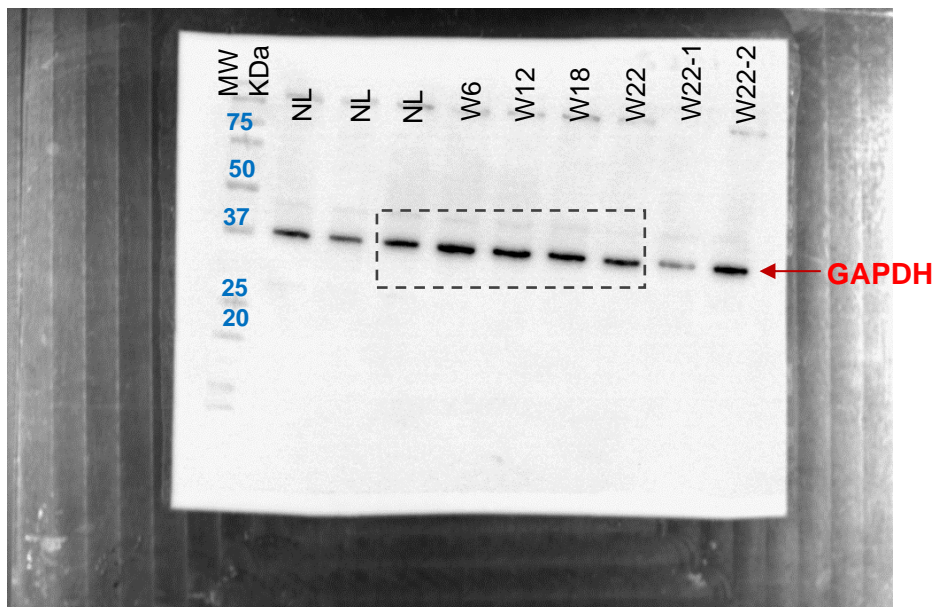



## Original blots of Figure 2

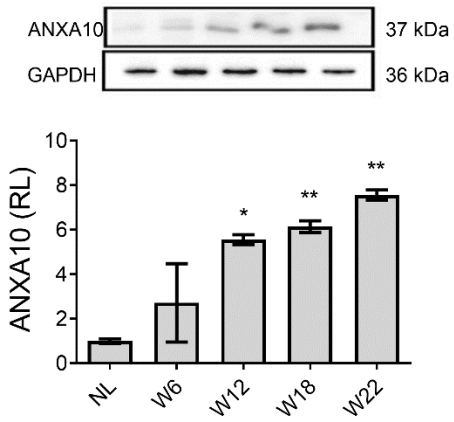

### General information

**Annexin A10.** ANXA10 [1:500]; NBP1-90156; RRID: AB\_11004664

12-second exposure time

Theoretical MW: 37 KDa

Supplier-reported MW: 25-35 KDa

Estimation MW: 31.9 KDa

**GAPDH,** [1:10000]; ab181602; RRID: AB\_2630358

9-second exposure time

Theoretical MW: 36 KDa

Supplier-reported MW: 25-37 KDa

Estimation MW: 36.9 KDa

Original images captured with the Uvitec MINI HD6 photo documentation system.

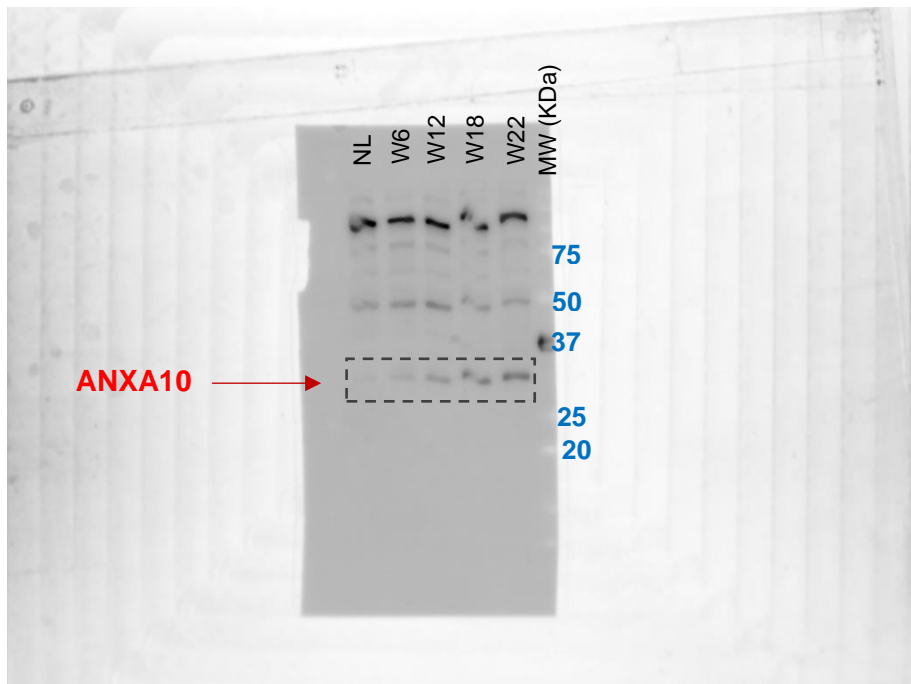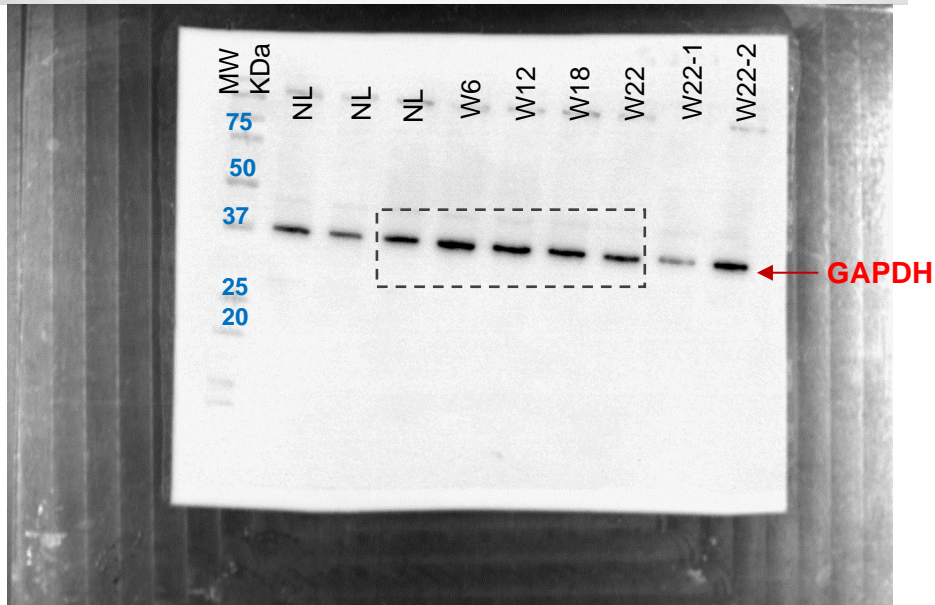

## Original blots of Figure 2

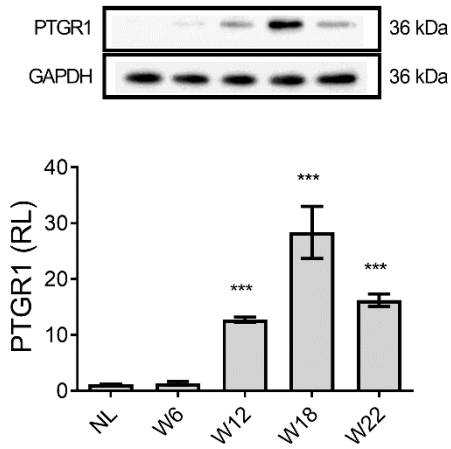

**General information**

**PTGR1.** (1:2600); GTX118527; RRID: AB\_10618960  
 6-second exposure time  
 Theoretical MW: 36 KDa  
 Supplier-reported MW: 34-43 KDa  
 Estimation MW: 33.8 KDa

**GAPDH.** [1:10000]; ab181602; RRID: AB\_2630358  
 5-second exposure time  
 Theoretical MW: 36 KDa  
 Supplier-reported MW: 25-37 KDa  
 Estimation MW: 36.9 KDa

Original images captured with the Uvitec MINI HD6 photo documentation system.

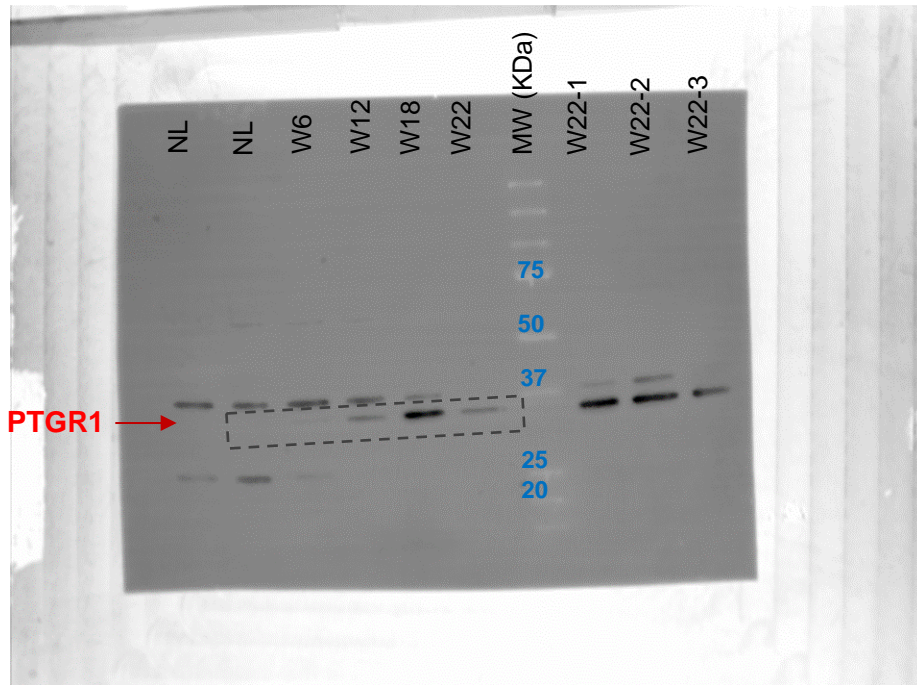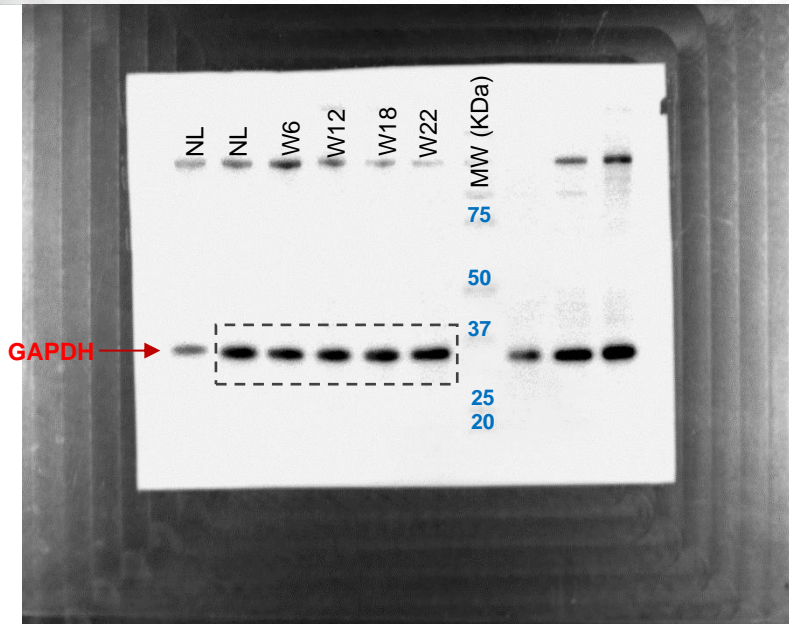

## Original blots of Figure 2

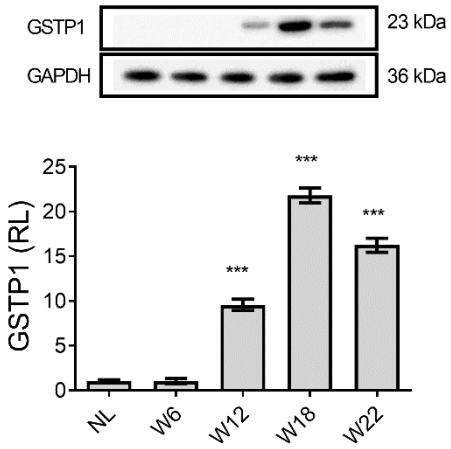

**General information**

**GSTP1.** [1:10000]; NBP2-16756  
5-second exposure time  
Theoretical MW: 23 KDa  
Supplier-reported MW: 15-25 KDa  
Estimation MW: 23.6 KDa

**GAPDH,** [1:10000]; ab181602; RRID: AB\_2630358  
5-second exposure time  
Theoretical MW: 36 KDa  
Supplier-reported MW: 25-37 KDa  
Estimation MW: 36.9 KDa

Original images captured with the Uvitec MINI HD6 photo documentation system.

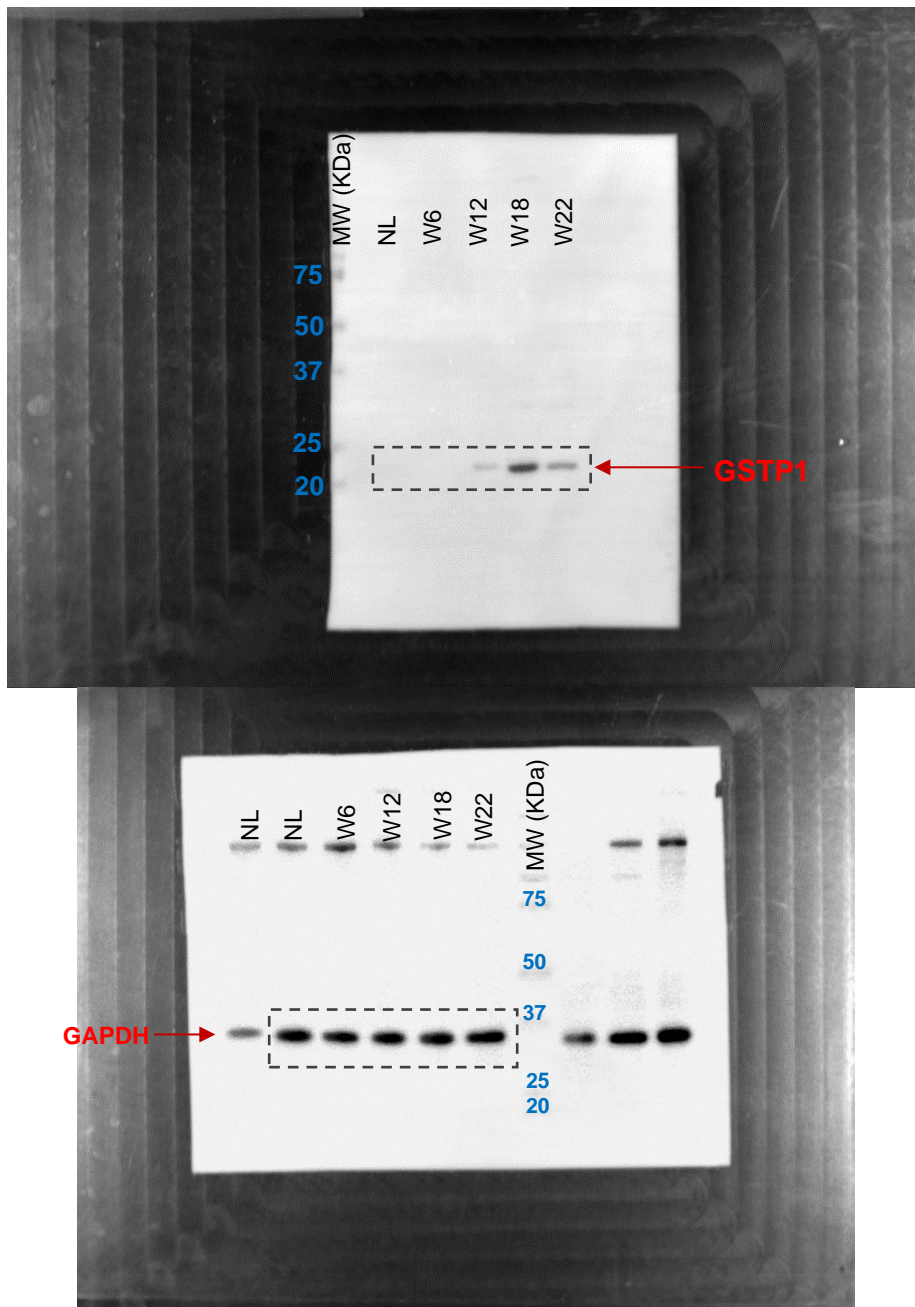



## Original blots of Figure 4

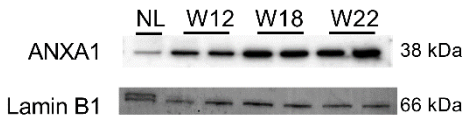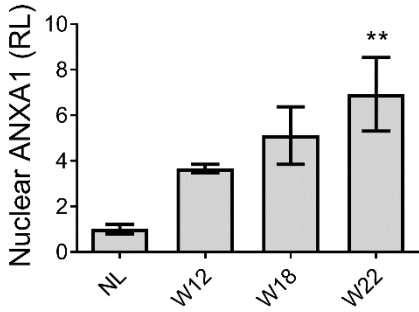

**General information**

**Annexin A1 Nuclear.** ANXA1 [1:300] NBP1-90162; RRID: AB\_11018791  
 15-second exposure time  
 Theoretical MW: 38 KDa  
 Supplier-reported MW: 35-55 KDa  
 Estimation MW: 37 KDa

**Lamin  $\beta$ 1.** [1:10000]; Ab16048; RRID: AB\_443298  
 5-min exposure time  
 Theoretical MW: 66 KDa  
 Supplier-reported MW: 50-75 KDa  
 Estimation MW: 66.3 KDa

Original images captured with the Uvitec MINI HD6 photo documentation system.

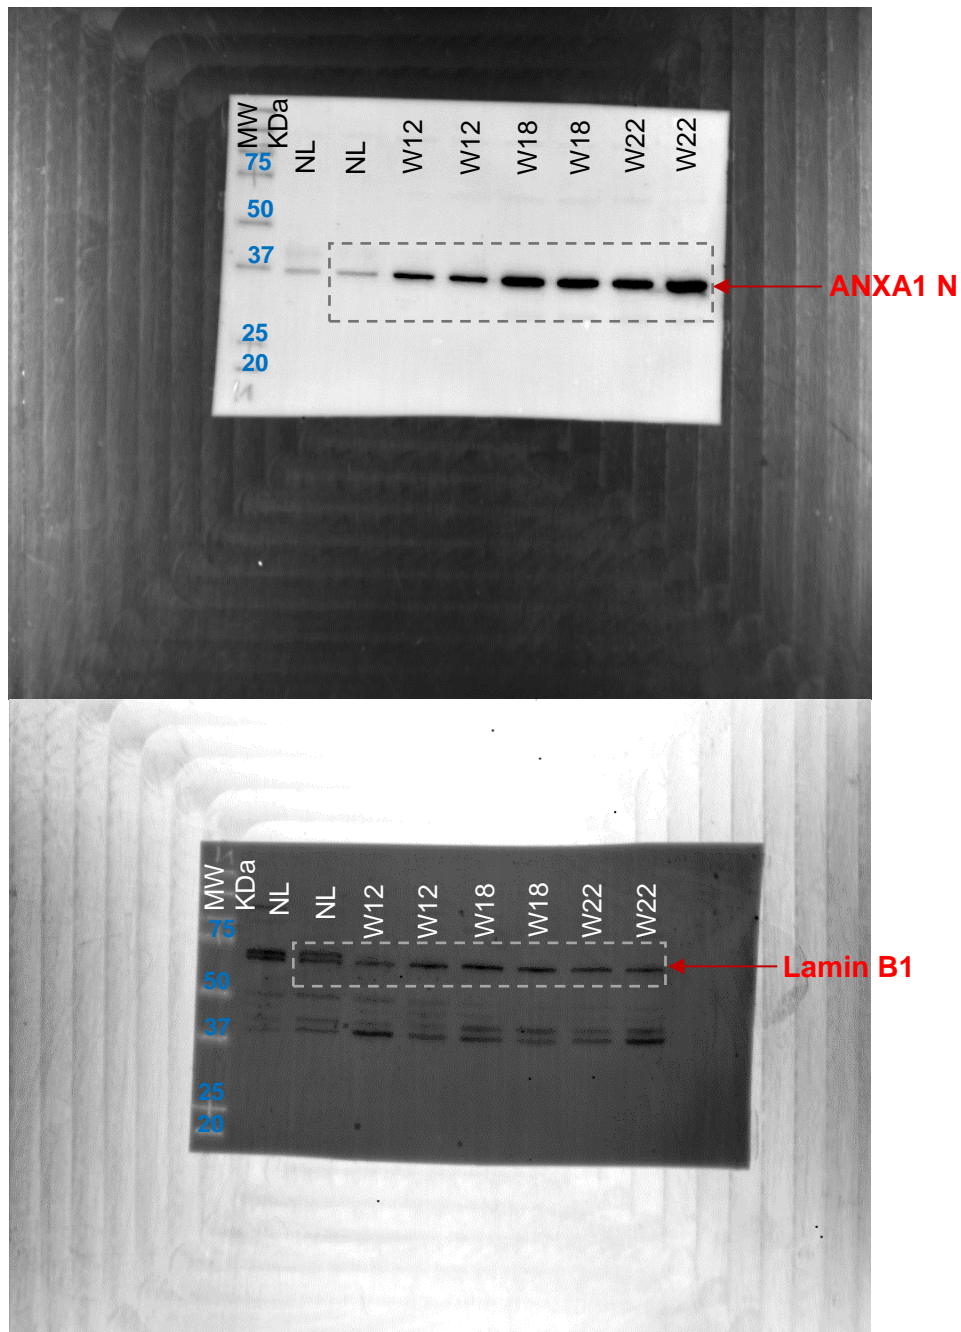

## Original blots of Figure 4

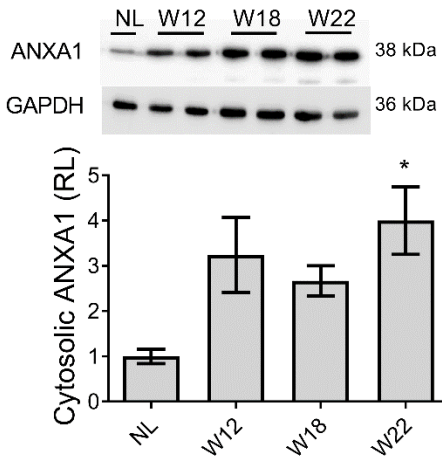

**General information**  
**Annexin A1 Cytosolic.** ANXA1 [1:300] NBP1-90162; RRID: AB\_11018791  
10-second exposure time  
Theoretical MW: 38 KDa  
Supplier-reported MW: 35-55 KDa  
Estimation MW: 36.8 KDa

**GAPDH.** [1:10000]; ab181602; RRID: AB\_2630358  
4-second exposure time  
Theoretical MW: 36 KDa  
Supplier-reported MW: 25-37 KDa  
Estimation MW: 36.6 KDa

Original images captured with the Uvitec MINI HD6 photo documentation system.

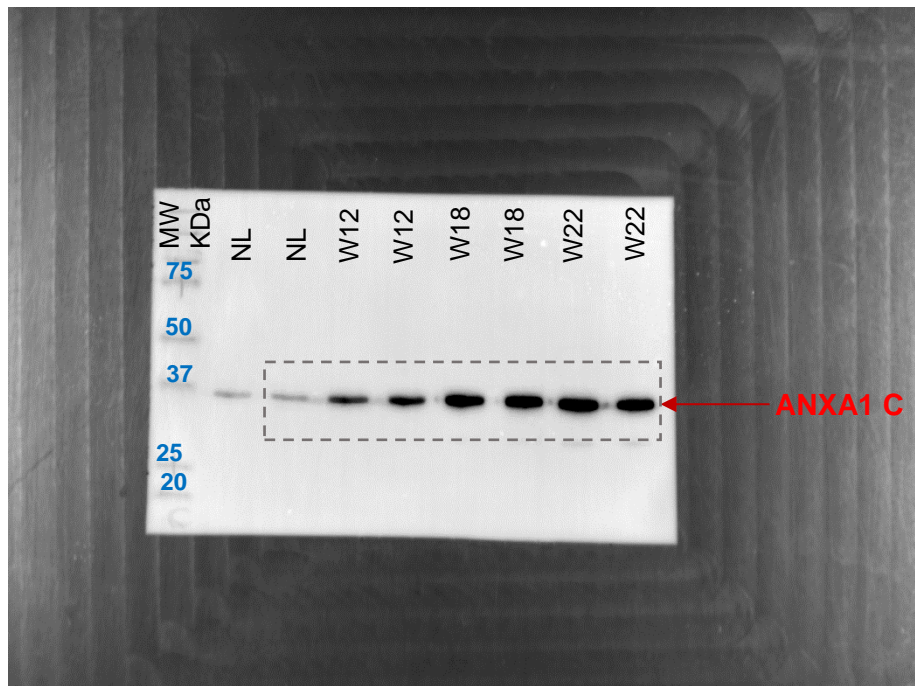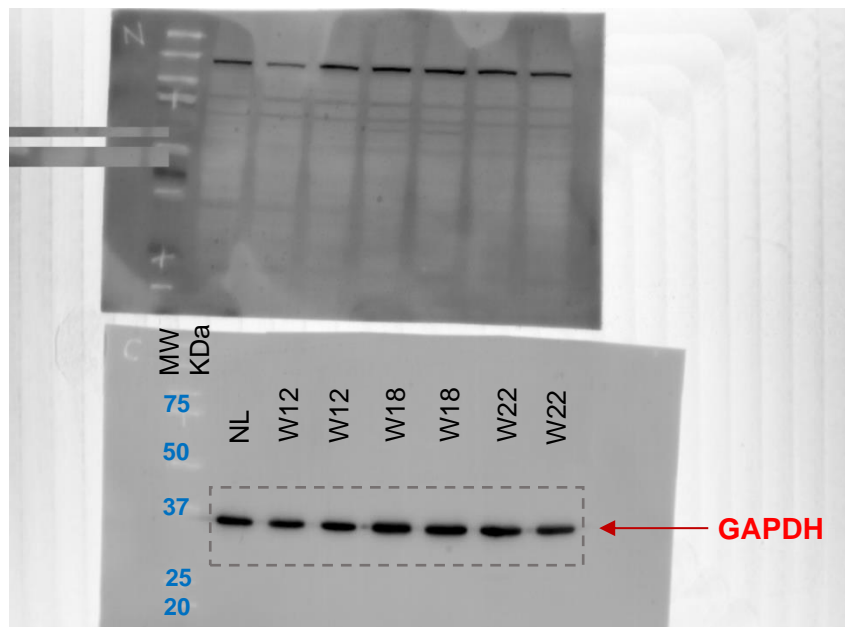



## Original blots of Figure 4

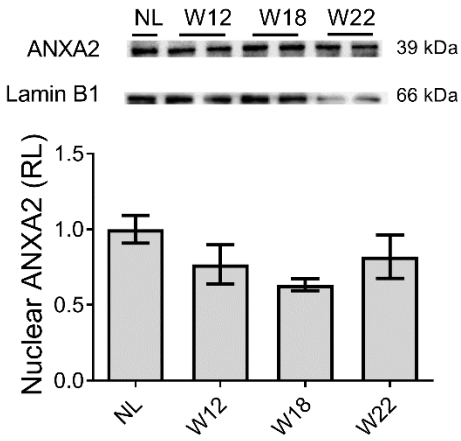

**General information**  
**Annexin A2 Nuclear.** ANXA1 [1:300] NBP1-90162; RRID: AB\_11018791  
4-second exposure time  
Theoretical MW: 39 KDa  
Supplier-reported MW: 35-55 KDa  
Estimation MW: 36.8 KDa

**Lamin  $\beta$ 1.** [1:10000]; Ab16048; RRID: AB\_443298  
2-min exposure time  
Theoretical MW: 66 KDa  
Supplier-reported MW: 50-75 KDa  
Estimation MW: 67.4 KDa

Original images captured with the Uvitec MINI HD6 photo documentation system.

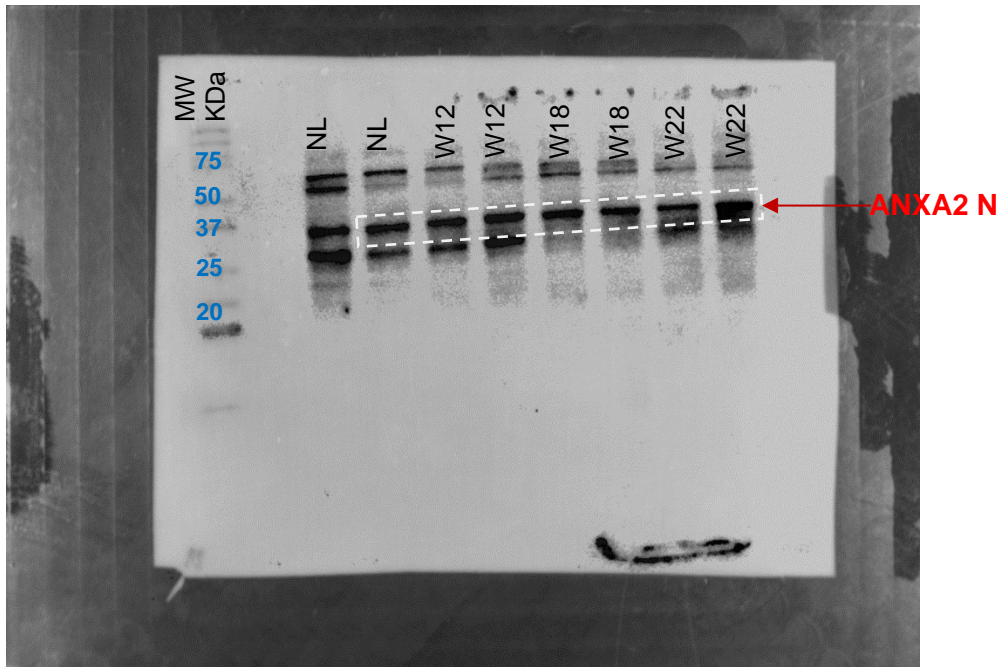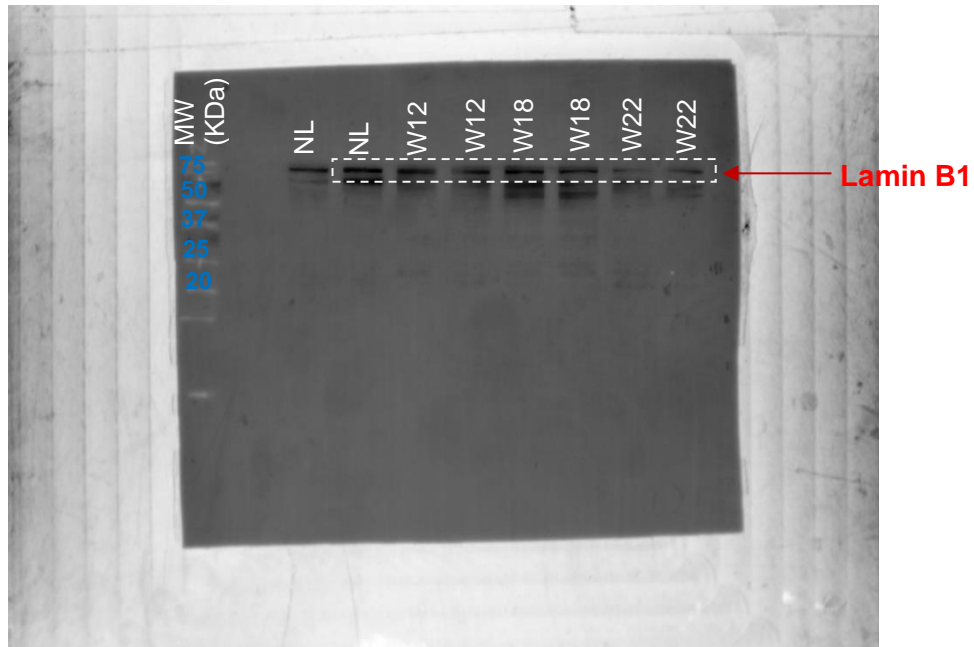

## Original blots of Figure 4

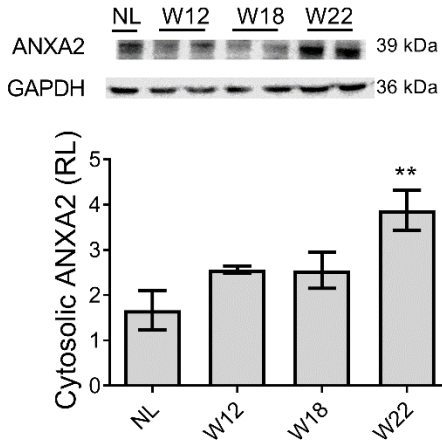

**General information**  
**Annexin A2 Cytosolic.** ANXA1 [1:300] NBP1-90162; RRID: AB\_11018791  
 10-second exposure time  
 Theoretical MW: 39 KDa  
 Supplier-reported MW: 35-55 KDa  
 Estimation MW: 36.2 KDa

**GAPDH.** [1:10000]; ab181602; RRID: AB\_2630358  
 5-second exposure time  
 Theoretical MW: 36 KDa  
 Supplier-reported MW: 25-37 KDa  
 Estimation MW: 36.8 KDa

Original images captured with the Uvitec MINI HD6 photo documentation system.

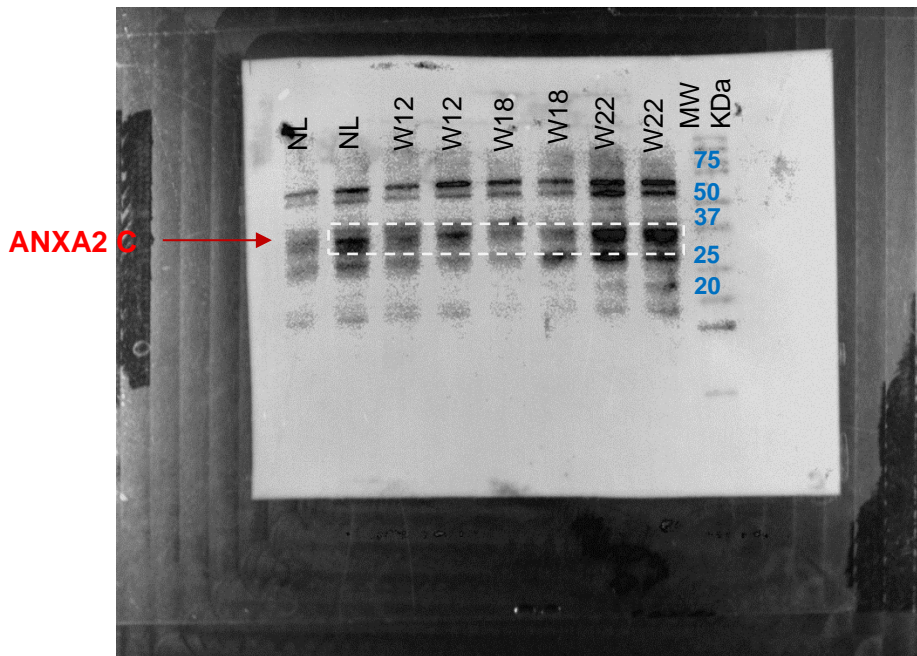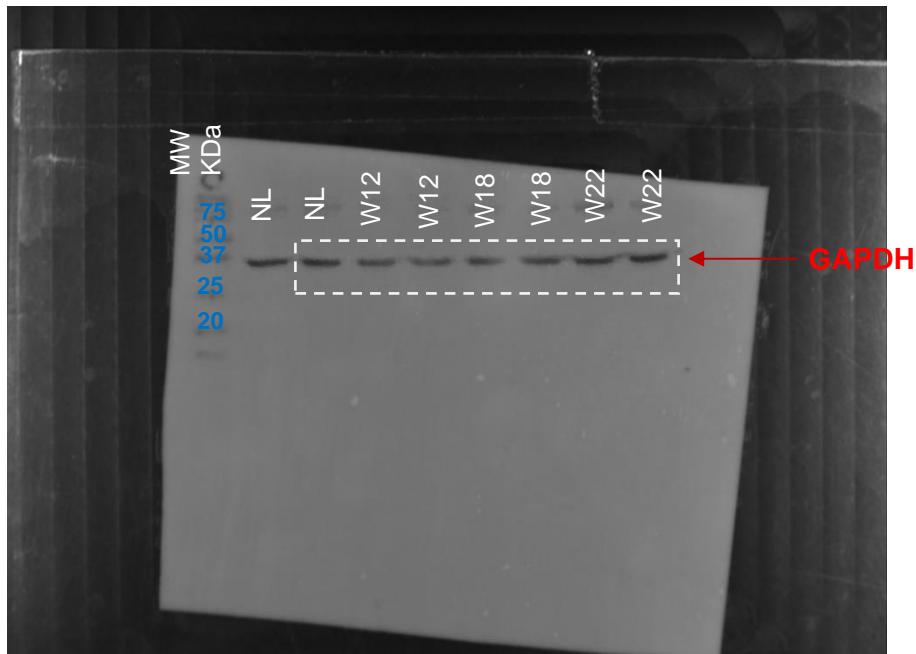

## Original blots of Figure 4

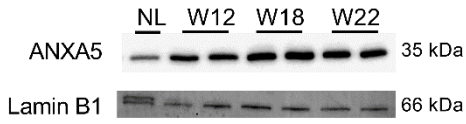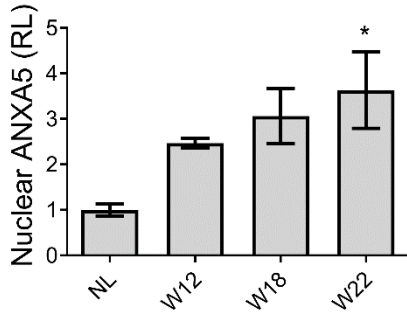

**General information**

**Annexin A5 Nuclear.** ANXA1 [1:300] NBP1-90162; RRID: AB\_11018791  
 5-second exposure time  
 Theoretical MW: 35 KDa  
 Supplier-reported MW: 35-55 KDa  
 Estimation MW: 35.2 KDa

**Lamin  $\beta$ 1.** [1:10000]; Ab16048; RRID: AB\_443298  
 5-min exposure time  
 Theoretical MW: 66 KDa  
 Supplier-reported MW: 50-75 KDa  
 Estimation MW: 66.3 KDa

Original images captured with the Uvitec MINI HD6 photo documentation system.

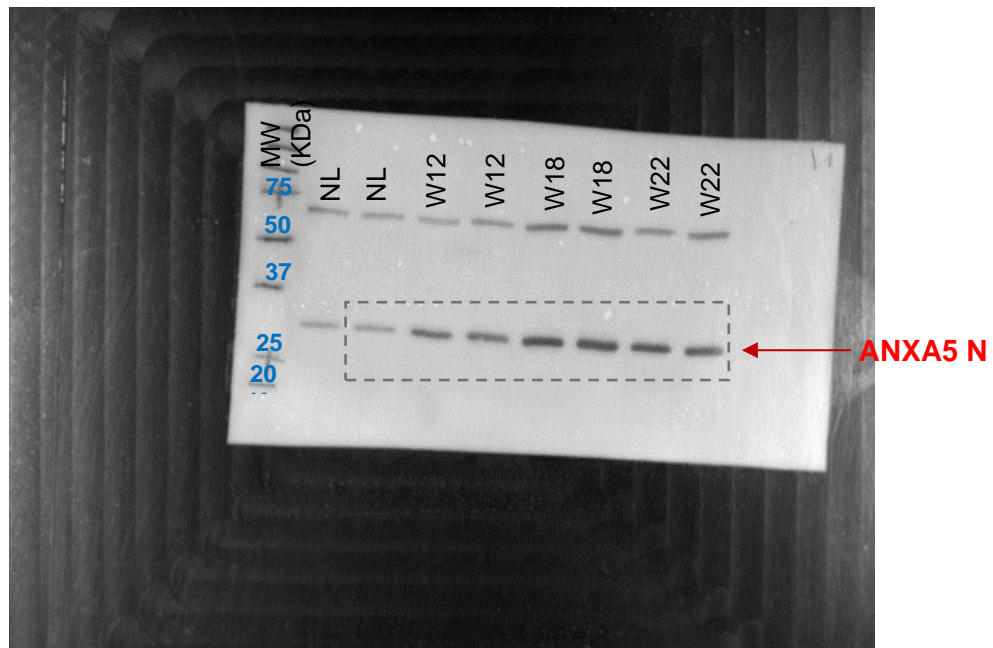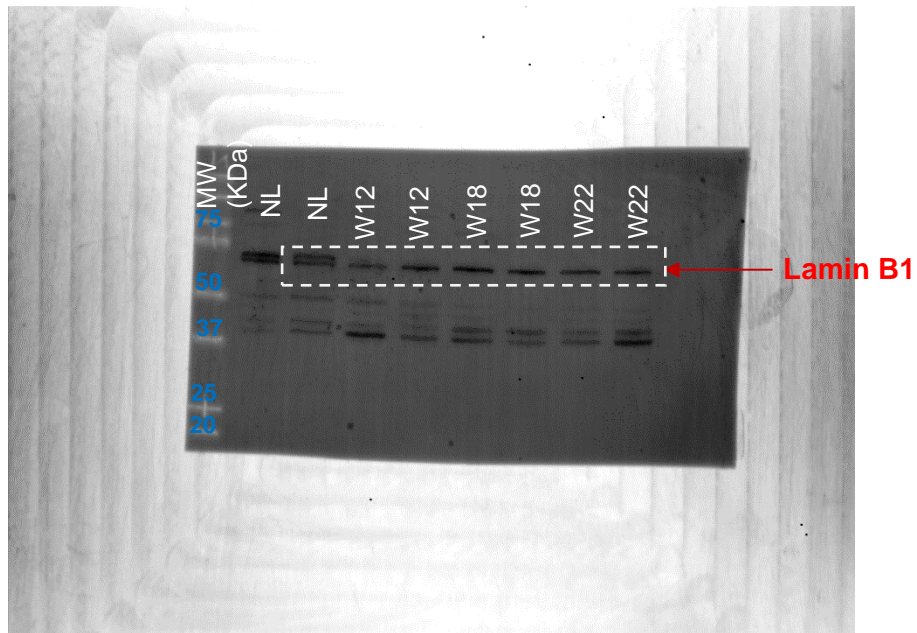

## Original blots of Figure 4

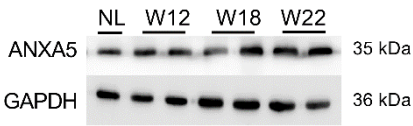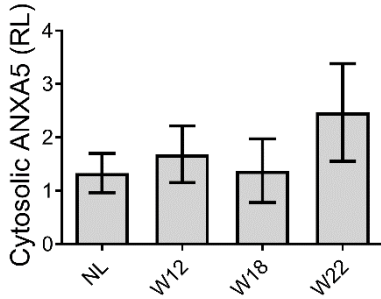

**General information**

**Annexin A5 Cytosolic.** ANXA1 [1:300] NBP1-90162; RRID: AB\_11018791  
 5-second exposure time  
 Theoretical MW: 35 KDa  
 Supplier-reported MW: 35-55 KDa  
 Estimation MW: 34.7 KDa

**GAPDH,** [1:10000]; ab181602; RRID: AB\_2630358  
 4-second exposure time  
 Theoretical MW: 36 KDa  
 Supplier-reported MW: 25-37 KDa  
 Estimation MW: 36.6 KDa

Original images captured with the Uvitec MINI HD6 photo documentation system.

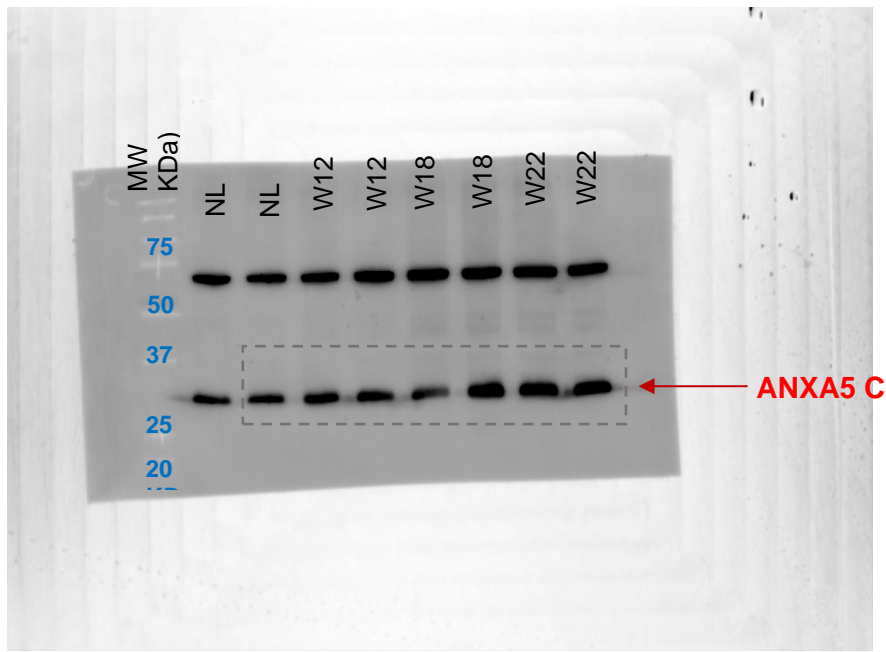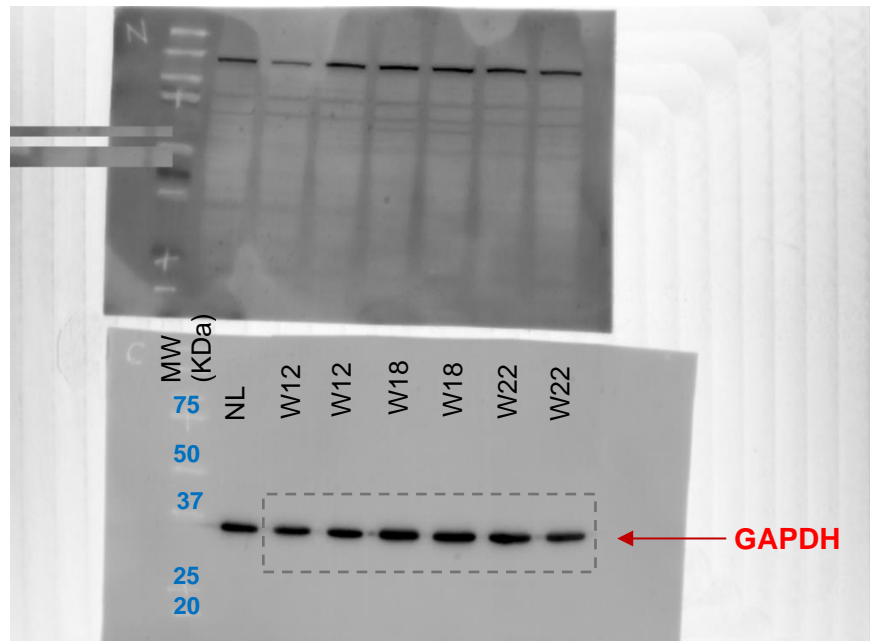

Supplement: 41598_2023_34117_MOESM1_ESM.pdf [file 41598_2023_34117_MOESM1_ESM.pdf]
